## S5 Appendix. Output hierarchical regression analysis

### Basic model with control variables child impairment, age, and sex

```
Call:
lm(formula = Sorgen_m ~ KBeein + KAlter_Gesamtmonate + KGesch,
    data = dat_complete, na.action = na.exclude)

Residuals:
    Min       1Q   Median       3Q      Max
-2.4813 -1.4088 -0.4914  1.0368  6.3699

Coefficients:
                Estimate Std. Error t value Pr(>|t|)
(Intercept)      2.362946   0.865114   2.731   0.0071 **
KBeein            0.668205   0.315566   2.117   0.0359 *
KAlter_Gesamtmonate 0.004370   0.007947   0.550   0.5832
KGeschWeiblich   -0.184778   0.346040  -0.534   0.5942
---
Signif. codes:  0 '***' 0.001 '**' 0.01 '*' 0.05 '.' 0.1 ' ' 1

Residual standard error: 1.807 on 143 degrees of freedom
Multiple R-squared:  0.03897,    Adjusted R-squared:  0.0188
F-statistic: 1.933 on 3 and 143 DF,  p-value: 0.127
```

### Expansion model with difficulties in restricting media consumption

```
Call:
lm(formula = Sorgen_m ~ KBeein + KAlter_Gesamtmonate + KGesch +
    UmgangE1, data = dat_complete, na.action = na.exclude)

Residuals:
    Min       1Q   Median       3Q      Max
-2.8259 -1.2089 -0.3385  0.9064  6.6873

Coefficients:
                Estimate Std. Error t value Pr(>|t|)
(Intercept)      2.750626   0.809524   3.398 0.000882 ***
KBeein            0.347650   0.301330   1.154 0.250553
KAlter_Gesamtmonate -0.005419   0.007676  -0.706 0.481389
KGeschWeiblich   -0.227855   0.322308  -0.707 0.480757
UmgangE1          0.248446   0.051848   4.792 4.12e-06 ***
---
Signif. codes:  0 '***' 0.001 '**' 0.01 '*' 0.05 '.' 0.1 ' ' 1

Residual standard error: 1.682 on 142 degrees of freedom
Multiple R-squared:  0.1727,    Adjusted R-squared:  0.1494
F-statistic: 7.412 on 4 and 142 DF,  p-value: 1.886e-05
```

**Expansion model with difficulties in restricting media consumption + Preference for digital media and media addiction**

Call:  
lm(formula = Sorgen\_m ~ KBeein + KAlter\_Gesamtmonate + KGesch +  
UmgangE1 + U\_Mediensucht\_m, data = dat\_complete, na.action = na.exclude)

Residuals:  
Min 1Q Median 3Q Max  
-2.1232 -0.8658 -0.1782 0.5098 7.6348

Coefficients:  
Estimate Std. Error t value Pr(>|t|)  
(Intercept) 1.611831 0.707988 2.277 0.0243 \*  
KBeein -0.183699 0.267117 -0.688 0.4928  
KAlter\_Gesamtmonate -0.012112 0.006613 -1.832 0.0691 .  
KGeschweiblich -0.084908 0.275733 -0.308 0.7586  
UmgangE1 0.015545 0.054427 0.286 0.7756  
U\_Mediensucht\_m 0.677830 0.092246 7.348 1.48e-11 \*\*\*

---  
Signif. codes: 0 '\*\*\*' 0.001 '\*\*' 0.01 '\*' 0.05 '.' 0.1 ' ' 1

Residual standard error: 1.436 on 141 degrees of freedom  
Multiple R-squared: 0.4018, Adjusted R-squared: 0.3806  
F-statistic: 18.94 on 5 and 141 DF, p-value: 2.223e-14

**Expansion model with difficulties in restricting media consumption + Preference for digital media and media addiction + How many hours can the child cope without media**

Call:  
lm(formula = Sorgen\_m ~ KBeein + KAlter\_Gesamtmonate + KGesch +  
UmgangE1 + U\_Mediensucht\_m + Aushalohn, data = dat\_complete,  
na.action = na.exclude)

Residuals:  
Min 1Q Median 3Q Max  
-2.3122 -0.8401 -0.2084 0.4901 7.5143

Coefficients:  
Estimate Std. Error t value Pr(>|t|)  
(Intercept) 3.105969 0.994715 3.122 0.00218 \*\*  
KBeein -0.280698 0.267861 -1.048 0.29648  
KAlter\_Gesamtmonate -0.013900 0.006588 -2.110 0.03665 \*  
KGeschweiblich -0.090724 0.272422 -0.333 0.73961  
UmgangE1 -0.006940 0.054813 -0.127 0.89943  
U\_Mediensucht\_m 0.589317 0.100304 5.875 2.94e-08 \*\*\*  
Aushalohn -0.176857 0.083717 -2.113 0.03641 \*

---  
Signif. codes: 0 '\*\*\*' 0.001 '\*\*' 0.01 '\*' 0.05 '.' 0.1 ' ' 1

Residual standard error: 1.418 on 140 degrees of freedom  
Multiple R-squared: 0.4203, Adjusted R-squared: 0.3954  
F-statistic: 16.92 on 6 and 140 DF, p-value: 1.249e-14

**Final model with difficulties in restricting media consumption + Preference for digital media and media addiction + How many hours can the child cope without media + Maximum media time**

Call:

```
lm(formula = Sorgen_m ~ KBeein + KAlter_Gesamtmonate + KGesch +
    UmgangE1 + U_Mediensucht_m + Aushalohn + MeZeitTag_mean,
    data = dat_complete, na.action = na.exclude)
```

Residuals:

```
      Min       1Q   Median       3Q      Max
-2.1187 -0.8087 -0.2433  0.4319  7.4549
```

Coefficients:

|                     | Estimate  | Std. Error | t value | Pr(> t ) |     |
|---------------------|-----------|------------|---------|----------|-----|
| (Intercept)         | 3.173988  | 0.992400   | 3.198   | 0.00171  | **  |
| KBeein              | -0.166739 | 0.278894   | -0.598  | 0.55091  |     |
| KAlter_Gesamtmonate | -0.011494 | 0.006783   | -1.694  | 0.09243  | .   |
| KGeschweiblich      | -0.068168 | 0.271937   | -0.251  | 0.80244  |     |
| UmgangE1            | -0.002929 | 0.054695   | -0.054  | 0.95737  |     |
| U_Mediensucht_m     | 0.585019  | 0.099998   | 5.850   | 3.36e-08 | *** |
| Aushalohn           | -0.194010 | 0.084306   | -2.301  | 0.02286  | *   |
| MeZeitTag_mean      | -0.002505 | 0.001777   | -1.410  | 0.16086  |     |

---

Signif. codes: 0 '\*\*\*' 0.001 '\*\*' 0.01 '\*' 0.05 '.' 0.1 ' ' 1

Residual standard error: 1.413 on 139 degrees of freedom  
 Multiple R-squared: 0.4285, Adjusted R-squared: 0.3997  
 F-statistic: 14.89 on 7 and 139 DF, p-value: 2.116e-14

**Model comparison**

Analysis of Variance Table

Model 1: Sorgen\_m ~ KBeein + KAlter\_Gesamtmonate + KGesch

Model 2: Sorgen\_m ~ KBeein + KAlter\_Gesamtmonate + KGesch + UmgangE1

Model 3: Sorgen\_m ~ KBeein + KAlter\_Gesamtmonate + KGesch + UmgangE1 + U\_Mediensucht\_m

Model 4: Sorgen\_m ~ KBeein + KAlter\_Gesamtmonate + KGesch + UmgangE1 + U\_Mediensucht\_m + Aushalohn

Model 5: Sorgen\_m ~ KBeein + KAlter\_Gesamtmonate + KGesch + UmgangE1 + U\_Mediensucht\_m + Aushalohn + MeZeitTag\_mean

|   | Res.Df | RSS    | Df | Sum of Sq | F       | Pr(>F)    |     |
|---|--------|--------|----|-----------|---------|-----------|-----|
| 1 | 143    | 466.87 |    |           |         |           |     |
| 2 | 142    | 401.89 | 1  | 64.985    | 32.5328 | 6.773e-08 | *** |
| 3 | 141    | 290.60 | 1  | 111.284   | 55.7105 | 8.336e-12 | *** |
| 4 | 140    | 281.63 | 1  | 8.978     | 4.4943  | 0.03578   | *   |
| 5 | 139    | 277.66 | 1  | 3.970     | 1.9873  | 0.16086   |     |

---

Signif. codes: 0 '\*\*\*' 0.001 '\*\*' 0.01 '\*' 0.05 '.' 0.1 ' ' 1
