**S2 Table.** Own property of digital media (children with ASD:  $n = 117$ , TD children:  $n = 58$ )

| <b>Digital media</b> | <b>Group</b> | <b>Own property</b> |
|----------------------|--------------|---------------------|
| PC/ Laptop           | ASD          | 19.66% ( $n = 23$ ) |
|                      | TD           | 8.62% ( $n = 5$ )   |
| Tablet               | ASD          | 64.1% ( $n = 75$ )  |
|                      | TD           | 37.93% ( $n = 22$ ) |
| Mobile phone         | ASD          | 34.19% ( $n = 40$ ) |
|                      | TD           | 31.03% ( $n = 18$ ) |
| Game console         | ASD          | 35.04% ( $n = 41$ ) |
|                      | TD           | 22.41% ( $n = 13$ ) |
| TV                   | ASD          | 18.8% ( $n = 22$ )  |
|                      | TD           | 15.52% ( $n = 9$ )  |
