**S3 Table.** Devices available and usable in the children's room

| <b>Group</b>          | <b>Devices available and usable in the children's room</b> |                         | <b>We only have one shared living space</b> |
|-----------------------|------------------------------------------------------------|-------------------------|---------------------------------------------|
|                       | <b>Yes</b>                                                 | <b>No</b>               |                                             |
| ASD ( <i>n</i> = 117) | 52.14% ( <i>n</i> = 61)                                    | 37.61% ( <i>n</i> = 44) | 10.26% ( <i>n</i> = 12)                     |
| TD ( <i>n</i> = 58)   | 48.28% ( <i>n</i> = 28)                                    | 44.83% ( <i>n</i> = 26) | 6.9% ( <i>n</i> = 4)                        |
