**S4 Table.** Average time spent on digital media per day

| Digital media   | Group | Average time spent on digital media per day ... | Never              | until up to 30 min | 30 min up to 2 hours          | 2 hours up to 4 hours | 4 hours and more   |
|-----------------|-------|-------------------------------------------------|--------------------|--------------------|-------------------------------|-----------------------|--------------------|
| PC/<br>Laptop   | ASD   | during the week                                 | 63.25%<br>(n = 74) | 14.53%<br>(n = 17) | n = 117<br>11.11%<br>(n = 13) | 7.69%<br>(n = 9)      | 3.42%<br>(n = 4)   |
|                 |       | on weekends/<br>holidays                        | 60%<br>(n = 69)    | 13.91%<br>(n = 16) | n = 115<br>9.57%<br>(n = 11)  | 4.35%<br>(n = 5)      | 12.17%<br>(n = 14) |
|                 | TD    | during the week                                 | 74.14%<br>(n = 43) | 15.52%<br>(n = 9)  | n = 58<br>10.35%<br>(n = 6)   | 0%<br>(n = 0)         | 0%<br>(n = 0)      |
|                 |       | on weekends/<br>holidays                        | 67.27%<br>(n = 37) | 20%<br>(n = 11)    | n = 55<br>9.09%<br>(n = 5)    | 1.82%<br>(n = 1)      | 1.82%<br>(n = 1)   |
| Tablet          | ASD   | during the week                                 | 20.51%<br>(n = 24) | 27.35%<br>(n = 32) | n = 117<br>29.06%<br>(n = 34) | 14.53%<br>(n = 17)    | 8.55%<br>(n = 10)  |
|                 |       | on weekends/<br>holidays                        | 15.52%<br>(n = 18) | 16.38%<br>(n = 19) | n = 116<br>31.04%<br>(n = 36) | 15.52%<br>(n = 18)    | 21.55%<br>(n = 25) |
|                 | TD    | during the week                                 | 31.04%<br>(n = 18) | 37.93%<br>(n = 22) | n = 58<br>24.14%<br>(n = 14)  | 6.9%<br>(n = 4)       | 0%<br>(n = 0)      |
|                 |       | on weekends/<br>holidays                        | 18.18%<br>(n = 10) | 34.55%<br>(n = 19) | n = 55<br>30.91%<br>(n = 17)  | 10.91%<br>(n = 6)     | 5.46%<br>(n = 3)   |
| Mobile<br>phone | ASD   | during the week                                 | 35.9%<br>(n = 42)  | 39.32%<br>(n = 46) | n = 117<br>12.82%<br>(n = 15) | 5.13%<br>(n = 6)      | 6.84%<br>(n = 8)   |
|                 |       | on weekends/<br>holidays                        | 27.35%<br>(n = 32) | 33.33%<br>(n = 39) | n = 117<br>17.95%<br>(n = 21) | 9.4%<br>(n = 11)      | 11.97%<br>(n = 14) |
|                 | TD    | during the week                                 | 43.1%<br>(n = 25)  | 34.48%<br>(n = 20) | n = 58<br>18.97%<br>(n = 11)  | 3.45%<br>(n = 2)      | 0%<br>(n = 0)      |
|                 |       | on weekends/<br>holidays                        | 33.33%<br>(n = 18) | 33.33%<br>(n = 18) | n = 54<br>18.52%<br>(n = 10)  | 11.11%<br>(n = 6)     | 3.7%<br>(n = 2)    |
| Game<br>console | ASD   | during the week                                 | 41.88%<br>(n = 49) | 30.77%<br>(n = 36) | n = 117<br>23.08%<br>(n = 27) | 0.86%<br>(n = 1)      | 3.42%<br>(n = 4)   |
|                 |       | on weekends/<br>holidays                        | 29.57%<br>(n = 34) | 24.35%<br>(n = 28) | n = 115<br>27.83%<br>(n = 32) | 13.04%<br>(n = 15)    | 5.22%<br>(n = 6)   |
|                 | TD    | during the week                                 | 63.79%<br>(n = 37) | 22.41%<br>(n = 13) | n = 58<br>12.07%<br>(n = 7)   | 1.72%<br>(n = 1)      | 0%<br>(n = 0)      |
|                 |       | on weekends/<br>holidays                        | 38.18%<br>(n = 21) | 18.18%<br>(n = 10) | n = 55<br>34.55%<br>(n = 19)  | 5.46%<br>(n = 3)      | 3.64%<br>(n = 2)   |

| Digital media | Group                                          | Average time spent on digital media per day ... | Never                    | until up to 30 min | 30 min up to 2 hours          | 2 hours up to 4 hours         | 4 hours and more   |                  |
|---------------|------------------------------------------------|-------------------------------------------------|--------------------------|--------------------|-------------------------------|-------------------------------|--------------------|------------------|
| TV            | ASD                                            | during the week                                 | 25.64%<br>(n = 30)       | 29.06%<br>(n = 34) | n = 117<br>31.62%<br>(n = 37) | 9.4%<br>(n = 11)              | 4.27%<br>(n = 5)   |                  |
|               |                                                | on weekends/<br>holidays                        | 12.93%<br>(n = 15)       | 13.79%<br>(n = 16) | n = 116<br>44.83%<br>(n = 52) | 18.97%<br>(n = 22)            | 9.48%<br>(n = 11)  |                  |
|               | TD                                             | during the week                                 | 21.43%<br>(n = 12)       | 41.07%<br>(n = 23) | n = 56<br>33.93%<br>(n = 19)  | 3.57%<br>(n = 2)              | 0%<br>(n = 0)      |                  |
|               |                                                | on weekends/<br>holidays                        | 5.36%<br>(n = 3)         | 14.29%<br>(n = 8)  | n = 56<br>60.71%<br>(n = 34)  | 16.07%<br>(n = 9)             | 3.57%<br>(n = 2)   |                  |
|               | Music recorder (i.e. Tonie boxes, Audio-books) | ASD                                             | during the week          | 29.92%<br>(n = 35) | 23.93%<br>(n = 28)            | n = 117<br>33.33%<br>(n = 39) | 8.55%<br>(n = 10)  | 4.27%<br>(n = 5) |
|               |                                                |                                                 | on weekends/<br>holidays | 27.83%<br>(n = 32) | 23.48%<br>(n = 27)            | n = 115<br>25.22%<br>(n = 29) | 14.78%<br>(n = 17) | 8.7%<br>(n = 10) |
| TD            |                                                | during the week                                 | 20.69%<br>(n = 12)       | 32.76%<br>(n = 19) | n = 58<br>41.38%<br>(n = 24)  | 5.17%<br>(n = 3)              | 0%<br>(n = 0)      |                  |
|               |                                                | on weekends/<br>holidays                        | 11.11%<br>(n = 6)        | 24.07%<br>(n = 13) | n = 54<br>50%<br>(n = 27)     | 12.96%<br>(n = 7)             | 1.85%<br>(n = 1)   |                  |
