**S6 Table.** Age from which the child uses digital media almost daily

|                                                    | <b>ASD (<i>n</i> = 117)</b>                                          | <b>TD (<i>n</i> = 58)</b>                                            |
|----------------------------------------------------|----------------------------------------------------------------------|----------------------------------------------------------------------|
| Does not yet use daily                             | 6.84% ( <i>n</i> = 8)                                                | 31.04% ( <i>n</i> = 18)                                              |
| - Age at which parents would allow daily media use | - <i>M</i> = 10.83 ( <i>SD</i> = 1.33);<br>Range 10-13; <i>n</i> = 6 | - <i>M</i> = 11.24 ( <i>SD</i> = 1.89);<br>Range 8-14; <i>n</i> = 17 |
| Daily use                                          | 93.16% ( <i>n</i> = 109)                                             | 68.97% ( <i>n</i> = 40)                                              |
| - starting age of daily use                        | - <i>M</i> = 5.38 ( <i>SD</i> = 2.26);<br>Range 1-12; <i>n</i> = 109 | - <i>M</i> = 5.86 ( <i>SD</i> = 2);<br>Range 2-10; <i>n</i> = 40     |
