**S9 Table.** Parents' awareness of their children's use of digital media

| <b>Group</b>          | <b>Parents' awareness of their children's use of digital media</b> |                         |                          |
|-----------------------|--------------------------------------------------------------------|-------------------------|--------------------------|
|                       | <b>(almost) not at all</b>                                         | <b>partly</b>           | <b>completely</b>        |
| ASD ( <i>n</i> = 117) | 0% ( <i>n</i> = 0)                                                 | 12.82% ( <i>n</i> = 15) | 87.18% ( <i>n</i> = 102) |
| TD ( <i>n</i> = 58)   | 0% ( <i>n</i> = 0)                                                 | 18.97% ( <i>n</i> = 11) | 81.04% ( <i>n</i> = 47)  |
