**S10 Table.** Rules for media use

| <b>Group</b>          | <b>Existing rules on media use</b> |                         |
|-----------------------|------------------------------------|-------------------------|
|                       | <b>No</b>                          | <b>Yes</b>              |
| ASD ( <i>n</i> = 116) | 19.83% ( <i>n</i> = 23)            | 80.17% ( <i>n</i> = 93) |
| TD ( <i>n</i> = 57)   | 15.53% ( <i>n</i> = 6)             | 89.47% ( <i>n</i> = 51) |
